# Supplementary material for: Titania-mediated stabilization of fluorescent dye encapsulation in mesoporous silica nanoparticles
Source: PubMed Central journal article supplement (PMC11197426; doi:10.1039/d4na00242c), 2024-05-29
Supplement: NA-006-D4NA00242C-s001.pdf [file NA-006-D4NA00242C-s001.pdf]

## Supplementary Material:

### Titania-Mediated Stabilization of Fluorescent Dye Encapsulation in Mesoporous Silica Nanoparticles

Laura Spitzmüller, Jonathan Berson, Fabian Nitschke, Thomas Kohl, Thomas Schimmel

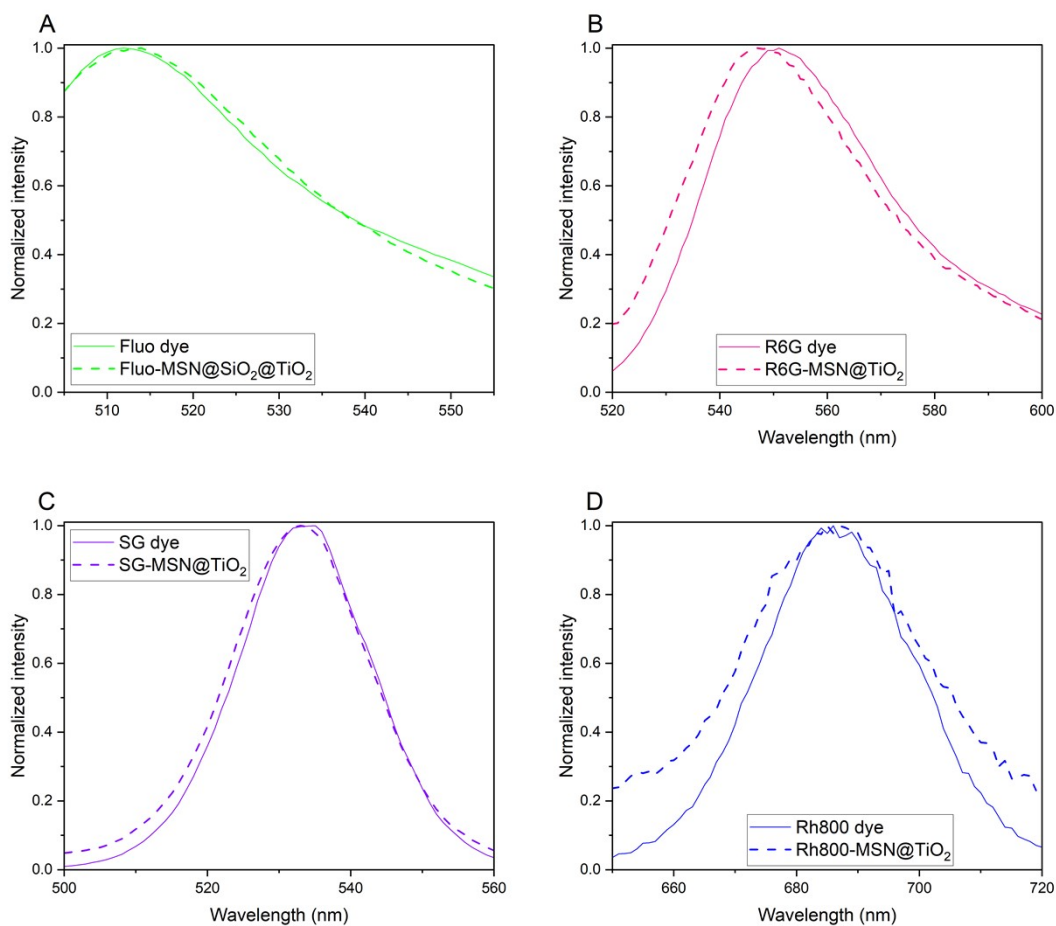

Figure S 1: Fluorescence emission spectra for sodium fluorescein/uranine/Fluo and Fluo-MSN@SiO<sub>2</sub>@TiO<sub>2</sub> (A), synchroscan spectrum ( $\lambda$  20) for rhodamine 6G and R6G-MSN@TiO<sub>2</sub> (B), synchroscan spectrum ( $\lambda$  20) sulforhodamine G and SG-MSN@TiO<sub>2</sub> (C) and synchroscan spectrum ( $\lambda$  23) for rhodamine 800 and Rh800-MSN@TiO<sub>2</sub> (D).

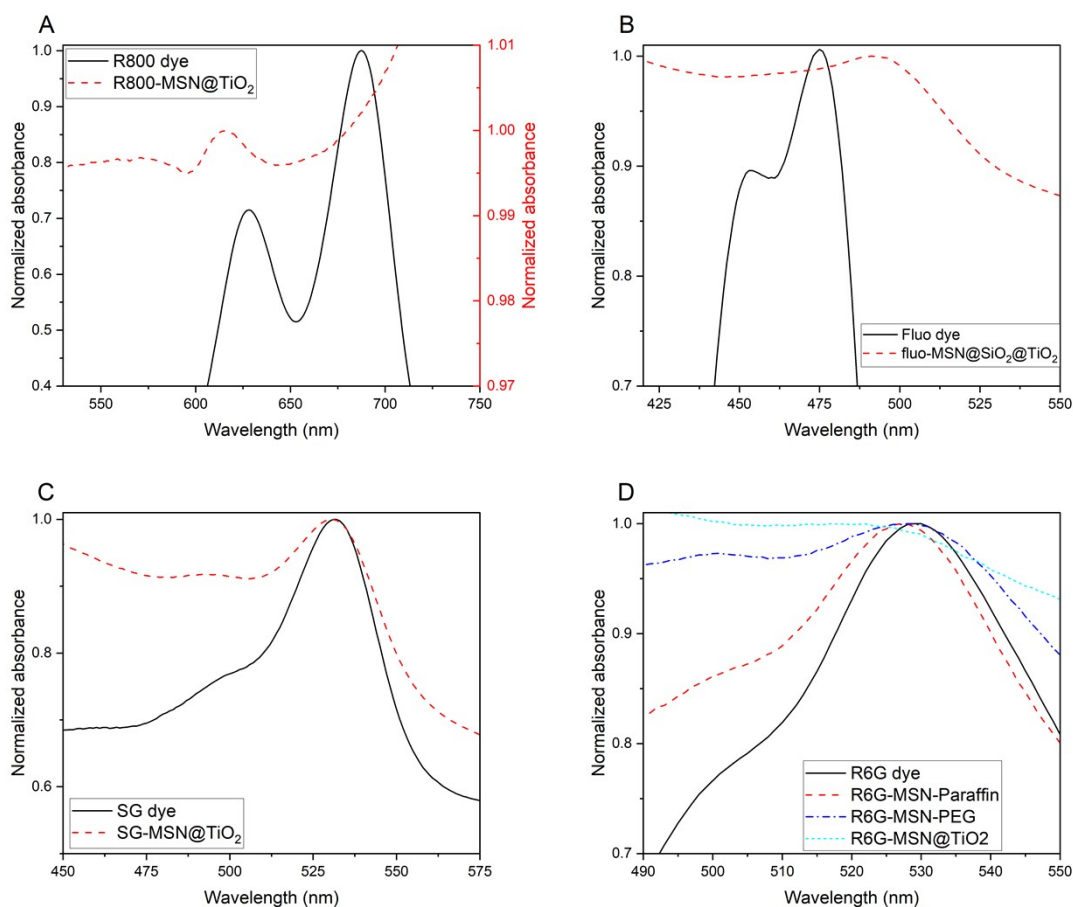

Figure S 2: Absorbance spectra: R800: Peak dye 629 nm (dimer) and 689 nm (monomer), R800-MSN@TiO<sub>2</sub> 617 nm (dimer). Fluorescein peak from mono- and dianionic forms, peak shift fluo-MSN@SiO<sub>2</sub>@TiO<sub>2</sub> corresponds to dianionic form. SG and SG-MSN@TiO<sub>2</sub>, R6G and R6G-MSN@TiO<sub>2</sub> show only minor peak shifts.

Table S 1: Stability of fluorescence intensity of dye-MSN@TiO<sub>2</sub> and dye in different solutions over time.

| Sample                     | Solution        | Fluorescence intensity at time 0 | Fluorescence intensity after 48 hours | Difference (%) |
|----------------------------|-----------------|----------------------------------|---------------------------------------|----------------|
| Rubpy-MSN@TiO <sub>2</sub> | Millipore water | 217.97                           | 209.86                                | 3.7            |
| Rh800-MSN@TiO <sub>2</sub> | Millipore water | 458.74                           | 483.85                                | 5.5            |
| R6G-MSN@TiO <sub>2</sub>   | Millipore water | 130.41                           | 135.93                                | 4.2            |
| RhB-MSN@TiO <sub>2</sub>   | Millipore water | 287.67                           | 284.02                                | 1.3            |
| SG-MSN@TiO <sub>2</sub>    | Millipore water | 126.94                           | 139.71                                | 9.1            |
| R6G-MSN@TiO <sub>2</sub>   | 0.01M NaCl      | 243.89                           | 238.86                                | 2.1            |
| R6G-MSN@TiO <sub>2</sub>   | 0.01M NaCl      | 274.07                           | 281.09                                | 2.6            |
| R6G-MSN@TiO <sub>2</sub>   | 0.01M NaCl      | 271.22                           | 284.77                                | 5.0            |
| RhB-MSN@TiO <sub>2</sub>   | 0.01M NaCl      | 514.55                           | 558.97                                | 8.6            |
| RhB-MSN@TiO <sub>2</sub>   | 0.01M NaCl      | 521.07                           | 522.12                                | 0.2            |
| RhB-MSN@TiO <sub>2</sub>   | 0.01M NaCl      | 272.58                           | 256.37                                | 5.9            |
| RhB-MSN@TiO <sub>2</sub>   | 0.01M NaCl      | 657.08                           | 724.38                                | 10.2           |
| SG-MSN@TiO <sub>2</sub>    | 0.01M NaCl      | 639.12                           | 667.36                                | 4.4            |

|                          |            |        |        |      |
|--------------------------|------------|--------|--------|------|
| SG-MSN@TiO <sub>2</sub>  | 0.01M NaCl | 420.96 | 434.96 | 3.3  |
| SG-MSN@TiO <sub>2</sub>  | 0.01M NaCl | 533.25 | 571.53 | 7.2  |
| R6G-MSN@TiO <sub>2</sub> | 0.1M NaCl  | 276.33 | 283.04 | 2.4  |
| R6G-MSN@TiO <sub>2</sub> | 0.1M NaCl  | 313.24 | 319.64 | 2.0  |
| R6G-MSN@TiO <sub>2</sub> | 0.1M NaCl  | 311.01 | 314.86 | 1.2  |
| RhB-MSN@TiO <sub>2</sub> | 0.1M NaCl  | 551.30 | 573.99 | 5.4  |
| RhB-MSN@TiO <sub>2</sub> | 0.1M NaCl  | 488.26 | 508.33 | 5.5  |
| SG-MSN@TiO <sub>2</sub>  | 0.1M NaCl  | 714.82 | 709.33 | 0.8  |
| SG-MSN@TiO <sub>2</sub>  | 0.1M NaCl  | 742.28 | 769.30 | 3.6  |
| SG-MSN@TiO <sub>2</sub>  | 0.1M NaCl  | 723.21 | 734.68 | 1.5  |
| R6G dye                  | 0.01M NaCl | 439.12 | 272.52 | 37.9 |
| R6G dye                  | 0.01M NaCl | 451.18 | 271.23 | 39.9 |
| RhB dye                  | 0.01M NaCl | 430.30 | 357.39 | 16.9 |
| RhB dye                  | 0.01M NaCl | 396.75 | 246.17 | 38.0 |
| RhB dye                  | 0.01M NaCl | 409.32 | 250.28 | 38.9 |
| SG dye                   | 0.01M NaCl | 448.98 | 467.17 | 4.1  |
| SG dye                   | 0.01M NaCl | 499.32 | 522.26 | 4.6  |
| SG dye                   | 0.01M NaCl | 434.10 | 463.33 | 6.7  |
| R6G dye                  | 0.1M NaCl  | 612.83 | 646.30 | 5.5  |
| R6G dye                  | 0.1M NaCl  | 773.09 | 680.35 | 12.0 |
| RhB dye                  | 0.1M NaCl  | 691.79 | 694.53 | 0.4  |
| RhB dye                  | 0.1M NaCl  | 571.79 | 576.54 | 0.9  |
| SG dye                   | 0.1M NaCl  | 203.70 | 208.70 | 2.5  |
| SG dye                   | 0.1M NaCl  | 211.22 | 213.33 | 1.0  |

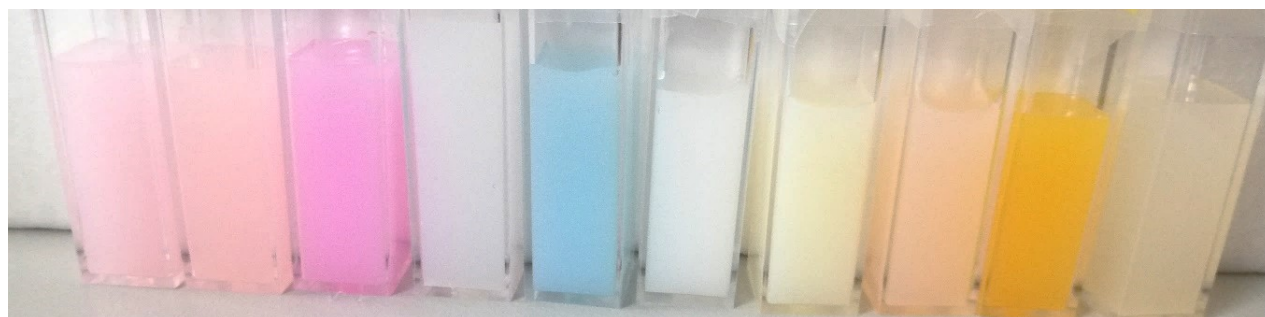

Figure S 3: Photograph of dye-MSN@TiO<sub>2</sub>. From left to right: R6G-MSN@TiO<sub>2</sub>, SG-MSN@TiO<sub>2</sub>, RhB-MSN@TiO<sub>2</sub>, C307-MSN@TiO<sub>2</sub>, NBA-MSN@TiO<sub>2</sub>, 1,3,6-naphthalene sulfonate NTS-MSN@TiO<sub>2</sub> (UV-Tracer, therefore no color visible and no fluorescence detected), Fluo-MSN@SiO<sub>2</sub>@TiO<sub>2</sub>, Rubpy-MSN@TiO<sub>2</sub>, Rubpy@SiNPs@SiO<sub>2</sub>, Fluo-MSN@TiO<sub>2</sub>.

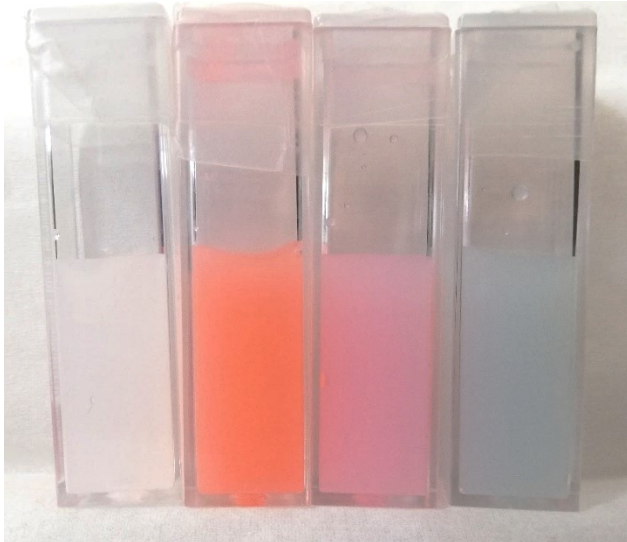

*Figure S 4: Photograph of pure titania particles, SG-MSN@TiO<sub>2</sub>, R6G-MSN@TiO<sub>2</sub>, R800-MSN@TiO<sub>2</sub> (from left to right).*
